# Supplementary material for: Utility and Mechanism of SHetA2 and Paclitaxel for Treatment of Endometrial Cancer
Source: MDPI journal article supplement (doi:10.3390/cancers13102322), 2021-05-12
Supplement: s1 [file s1]

---

*Supplementary Files*

# **Utility and Mechanism of SHetA2 and Paclitaxel for Treatment of Endometrial Cancer**

**Vishal Chandra, Rajani Rai and Doris Mangiaracina Benbrook**

Path Designer Network 1 HSPA5 8

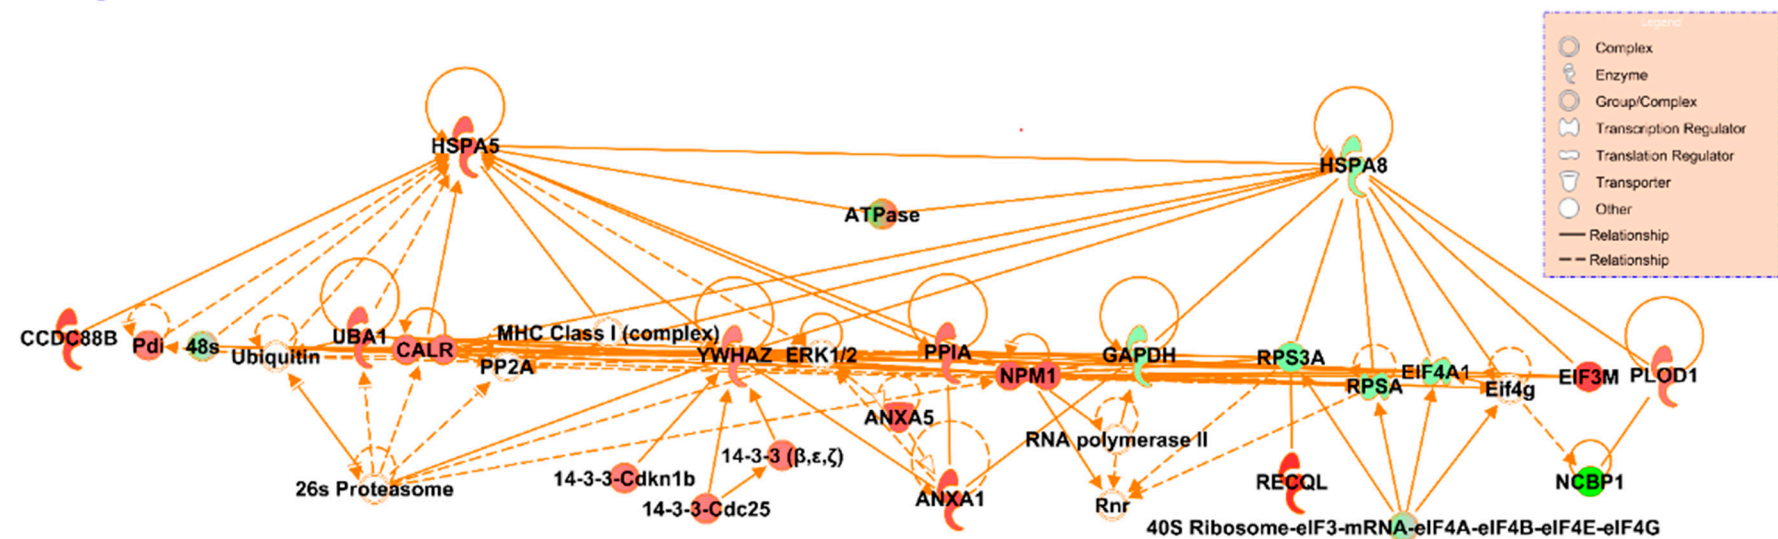

© 2000-2021 QIAGEN. All rights reserved.

Figure S1. Network Interactions of Grp78 and hsc70 in SHetA2 proteomic effects in Ishikawa endometrial cancer cells.

# Cell cycle Markers

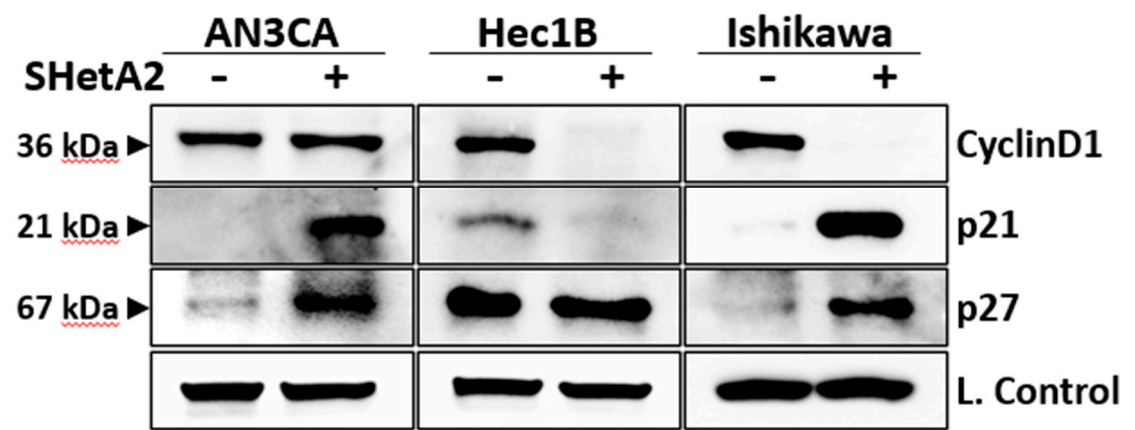

Loading Controls

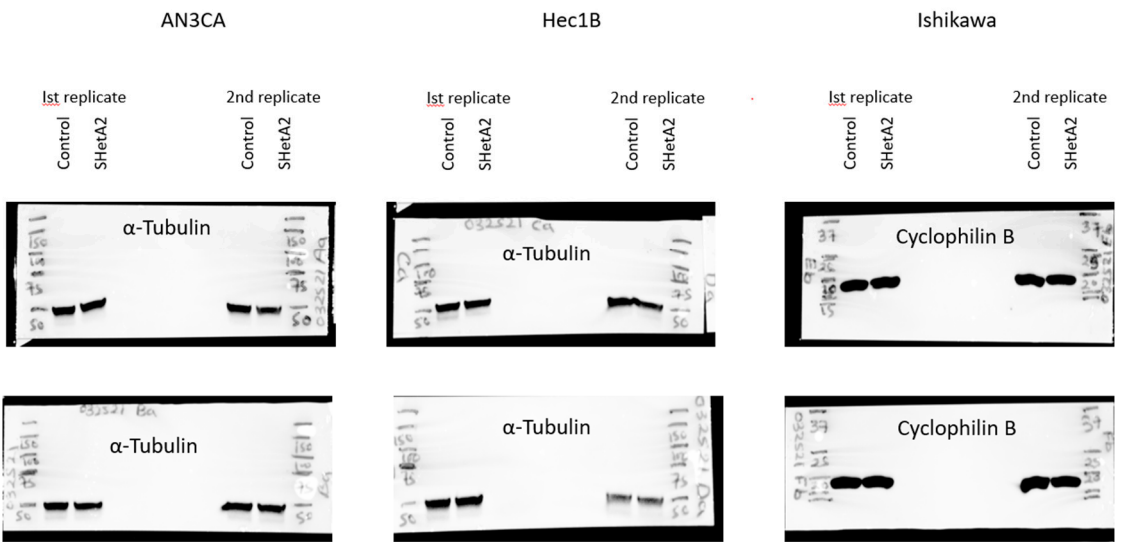

# Cyclin D1

AN3CA

Hec1B

Ishikawa

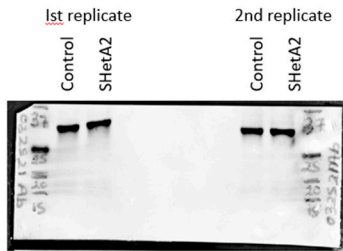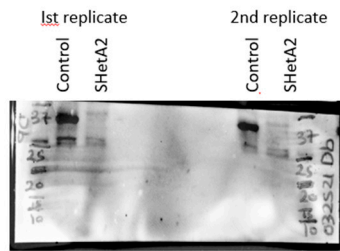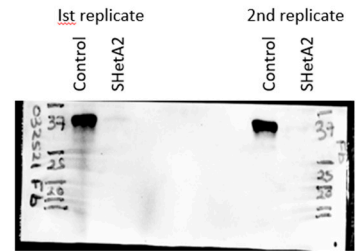

## P21

AN3CA

Hec1B

Ishikawa

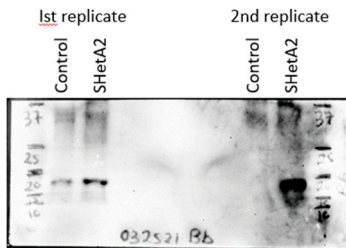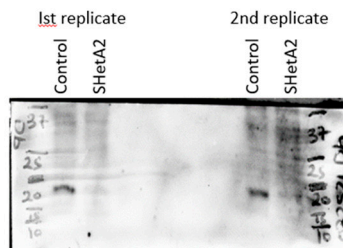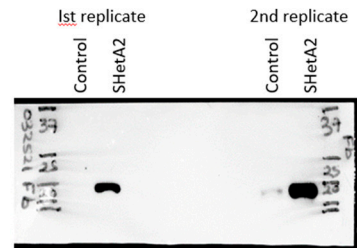

## P27

AN3CA

Hec1B

Ishikawa

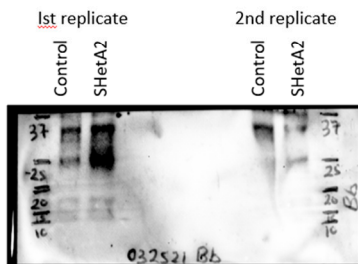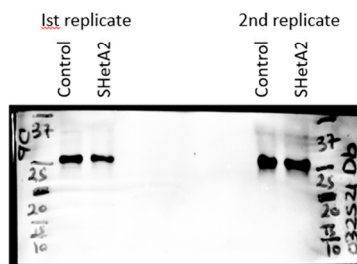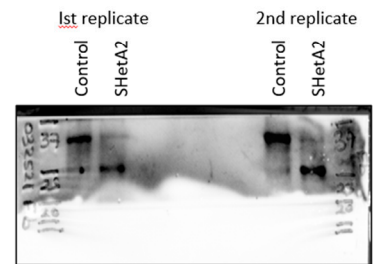

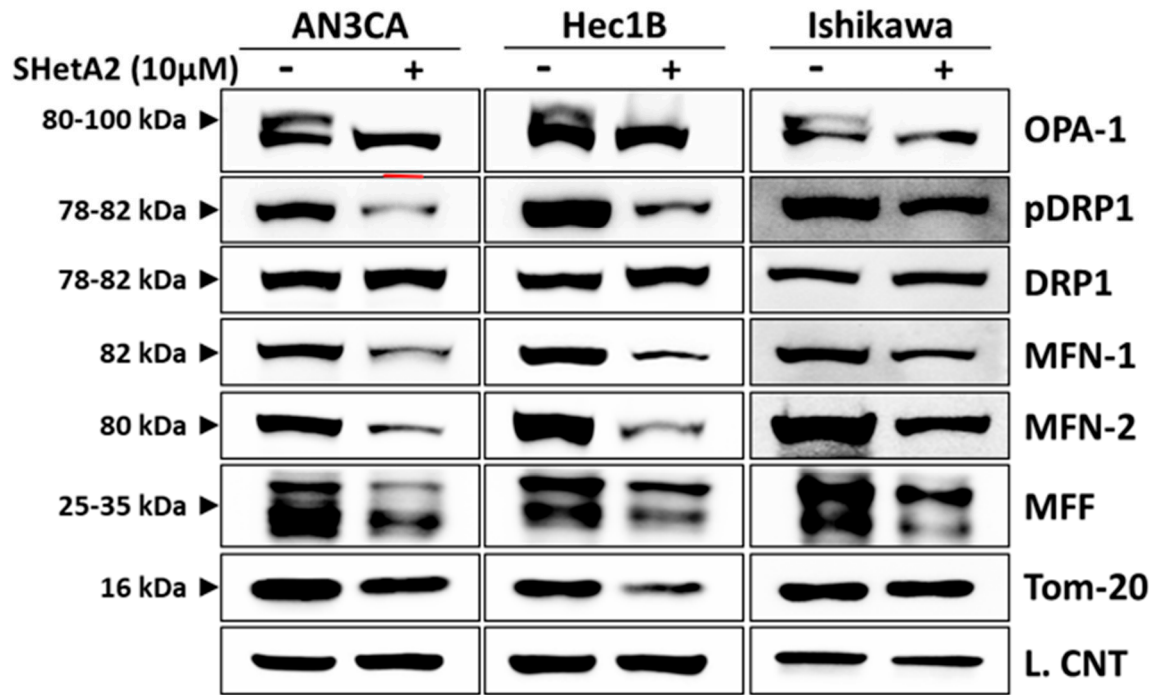

Loading Controls

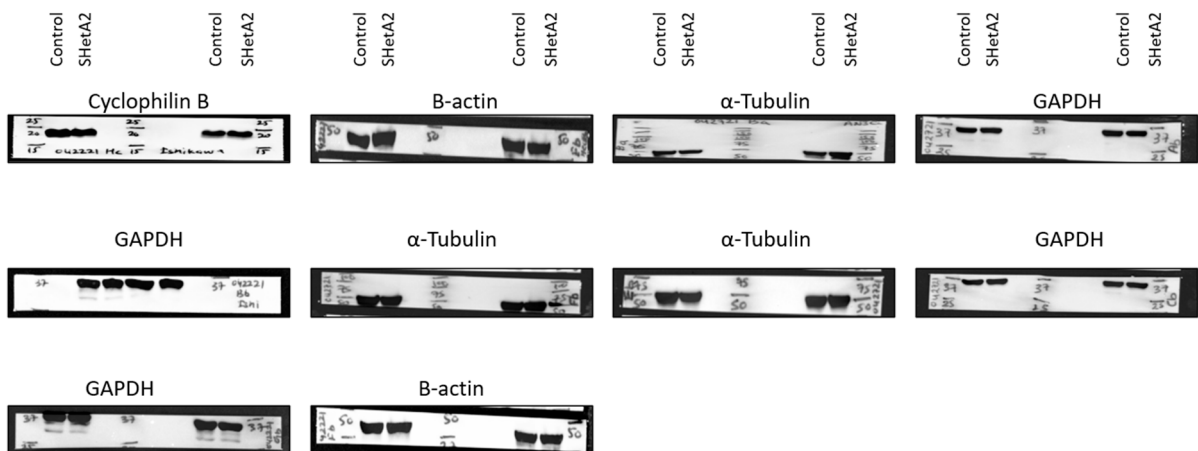

OPA1

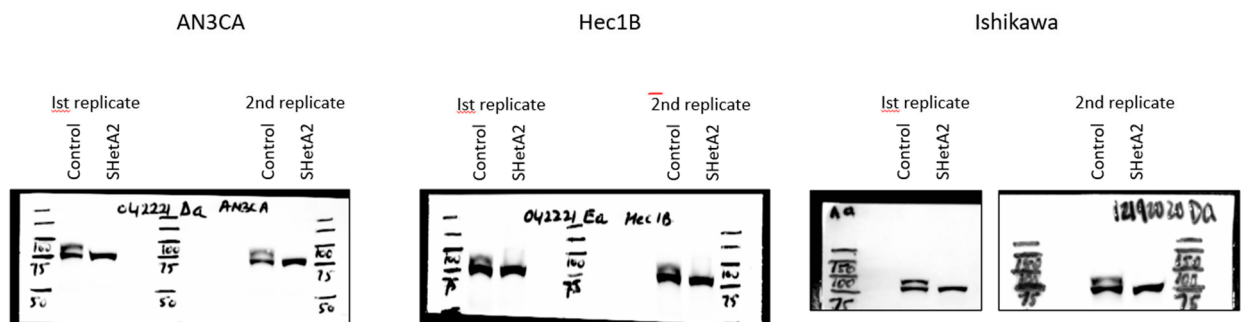

pDRP-1

AN3CA

Hec1B

Ishikawa

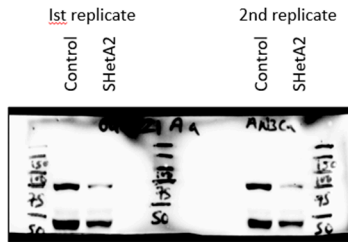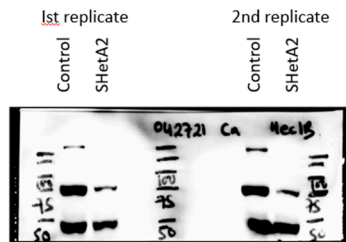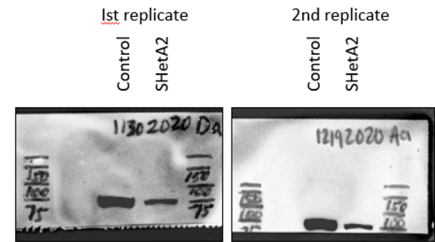

DRP-1

AN3CA

Hec1B

Ishikawa

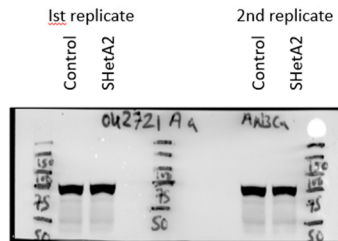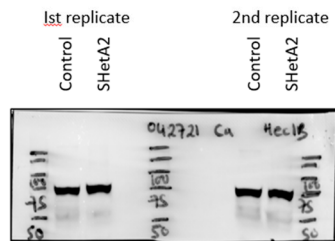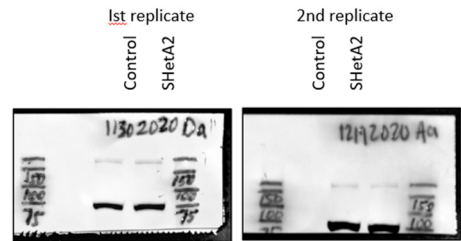

MFN-1

AN3CA

Hec1B

Ishikawa

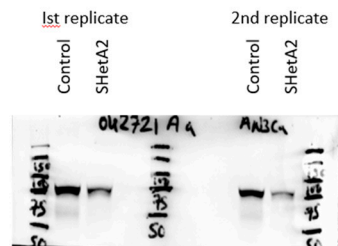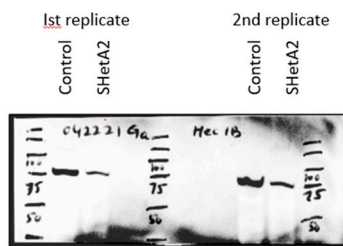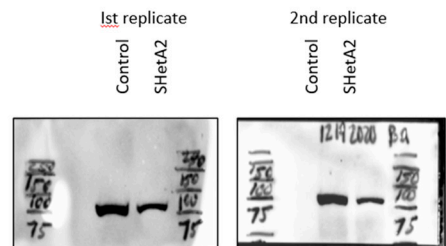

MFN-2

AN3CA

Hec1B

Ishikawa

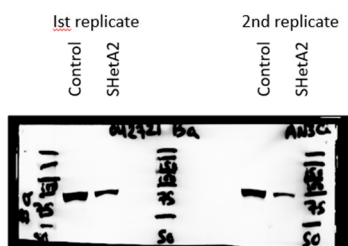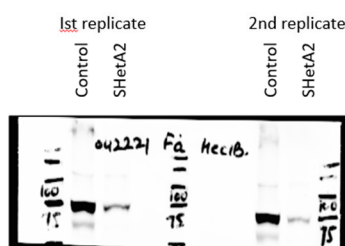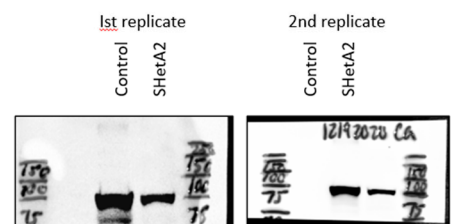

MFF

AN3CA

Hec1B

Ishikawa

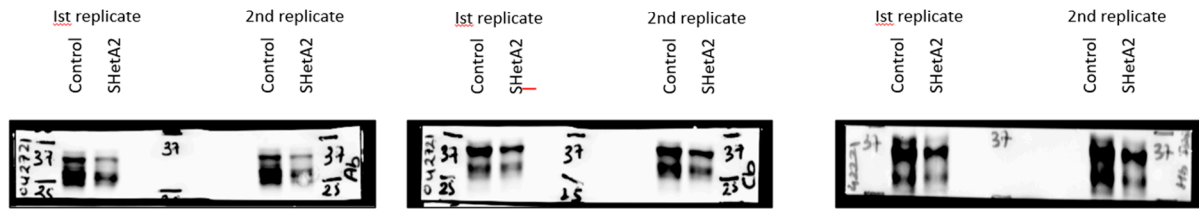

Tom20

AN3CA

Hec1B

Ishikawa

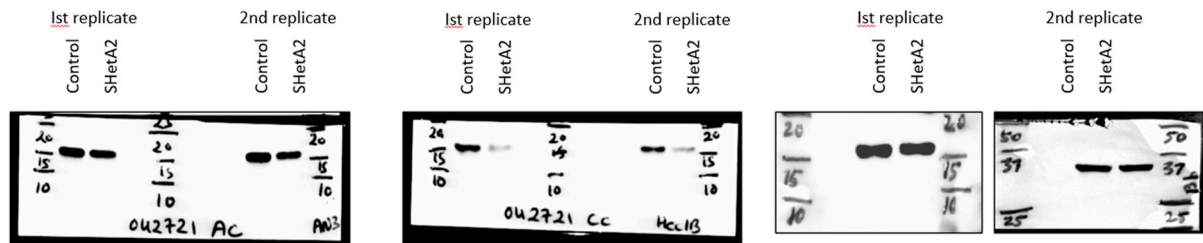

SHetA2 (10 $\mu$ M)      -      +

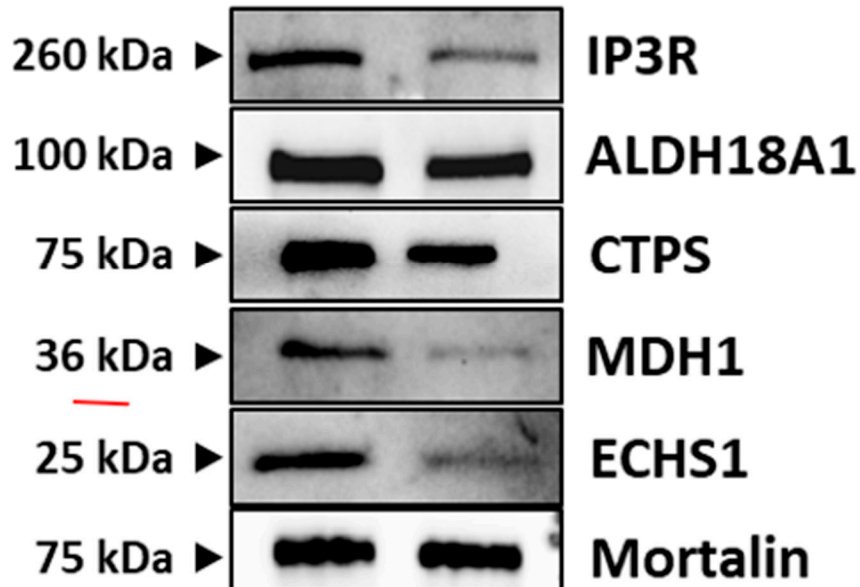

Ishikawa  
Co-IP results

IP3R

1st replicate

Control  
SHetA2

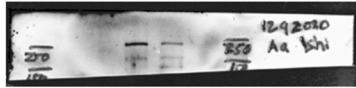

2nd replicate

Control  
SHetA2

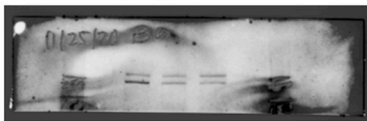

ALDH18A1

1st replicate

Control  
SHetA2

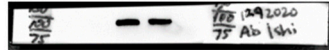

2nd replicate

Control  
SHetA2

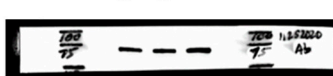

CTPS

1st replicate

Control  
SHetA2

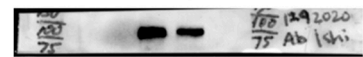

2nd replicate

Control  
SHetA2

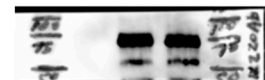

Ishikawa  
Co-IP results

MDH1

1st replicate

Control  
SHetA2

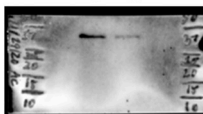

2nd replicate

Control  
SHetA2

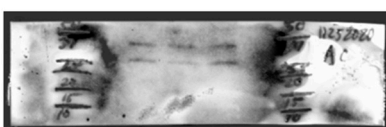

ECHS1

1st replicate

Control  
SHetA2

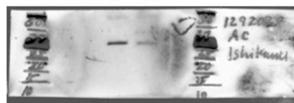

2nd replicate

Control  
SHetA2

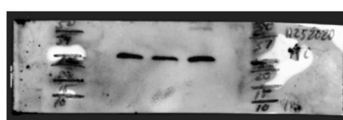

GRP75

1st replicate

Control  
SHetA2

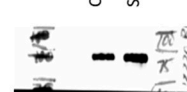

2nd replicate

Control  
SHetA2

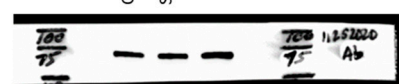

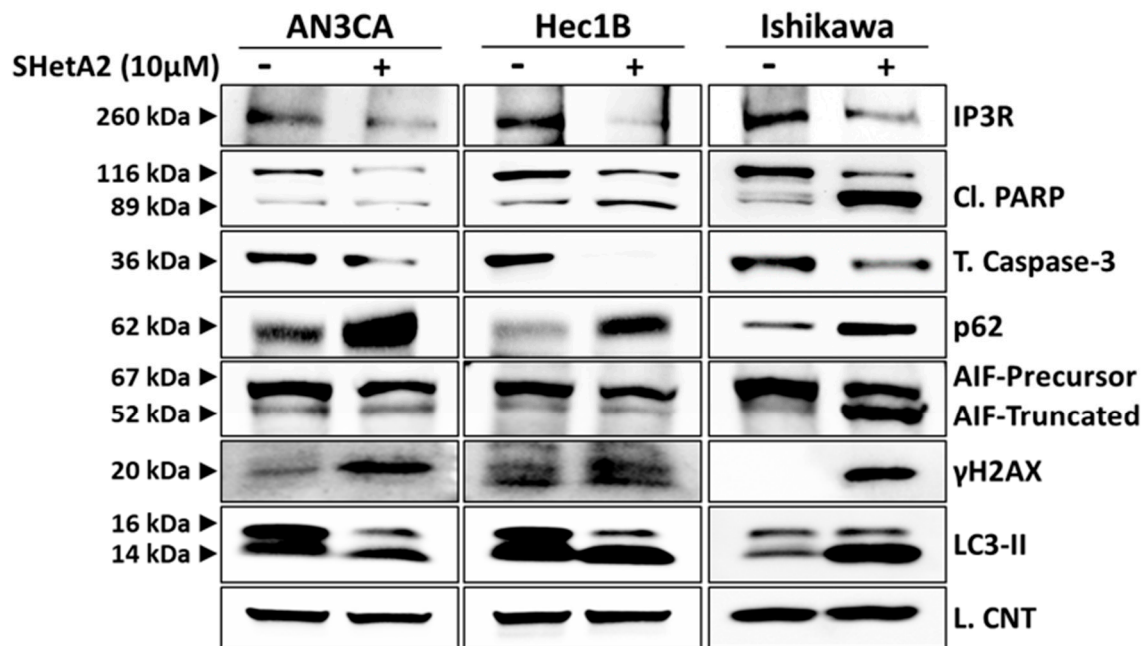

IP3R

AN3CA

Hec1B

Ishikawa

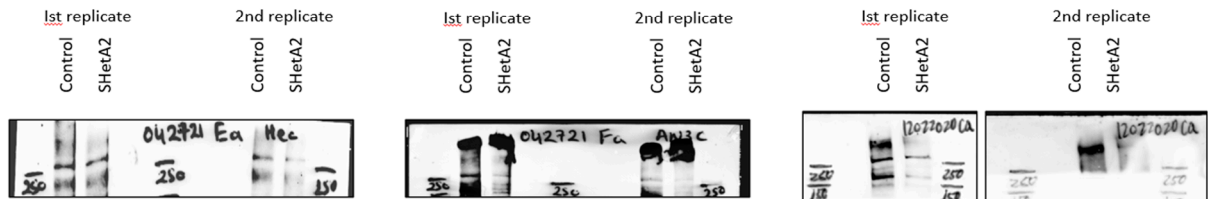

Total PARP

AN3CA

Hec1B

Ishikawa

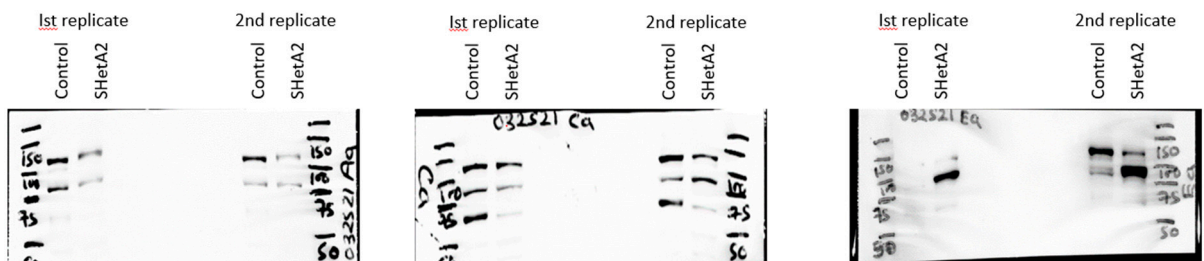

# Total Caspase-3

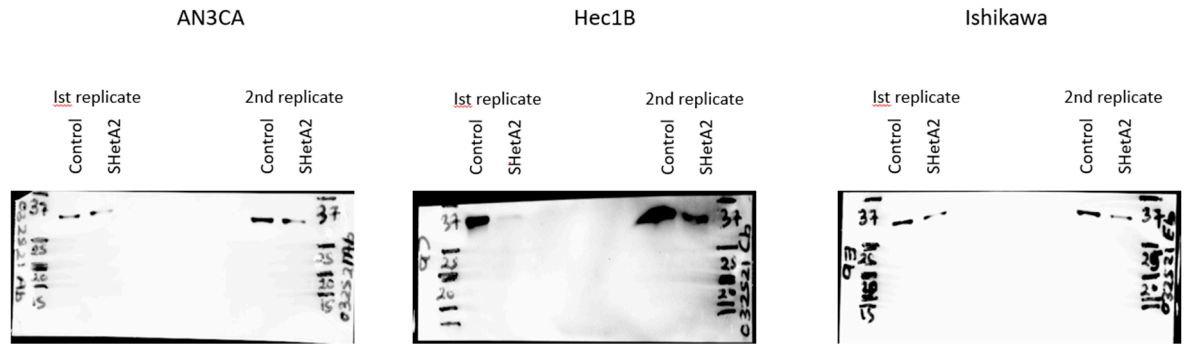

# p62

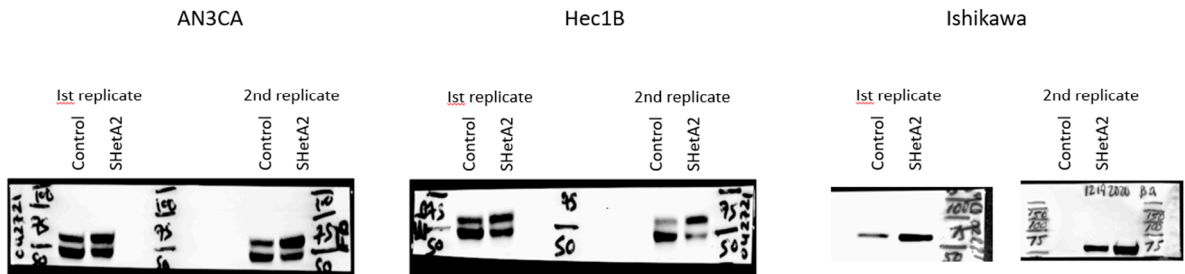

# AIF

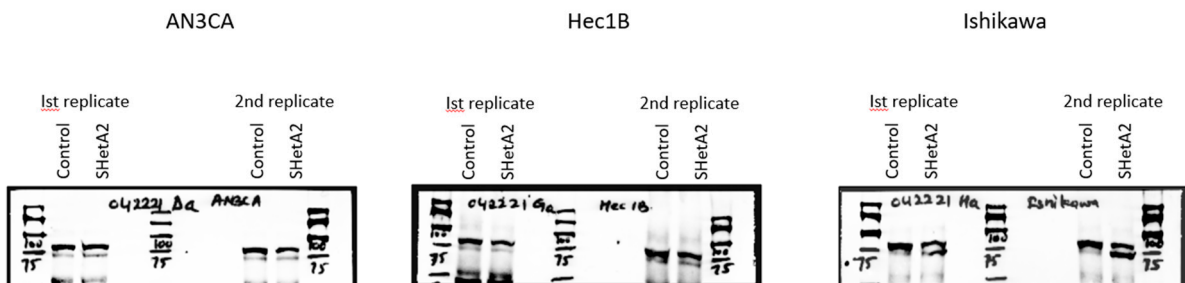

# H2ax

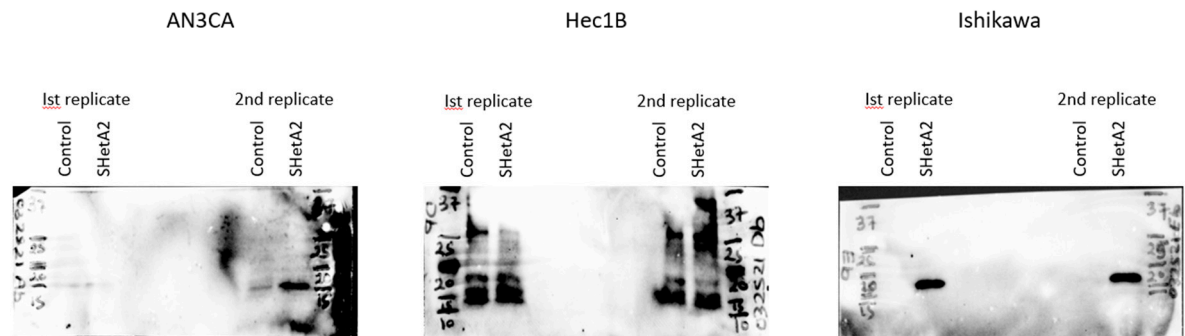

# LC IIIB

AN3CA

Hec1B

Ishikawa

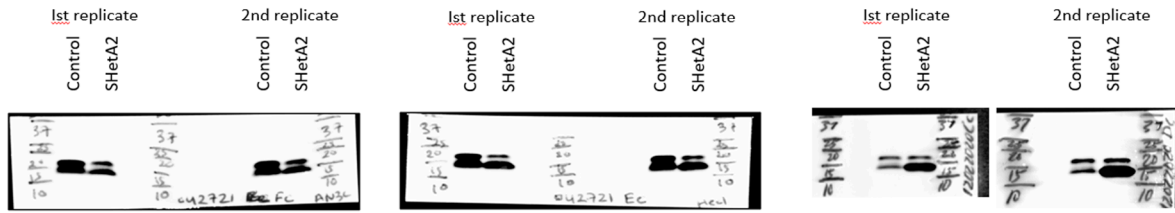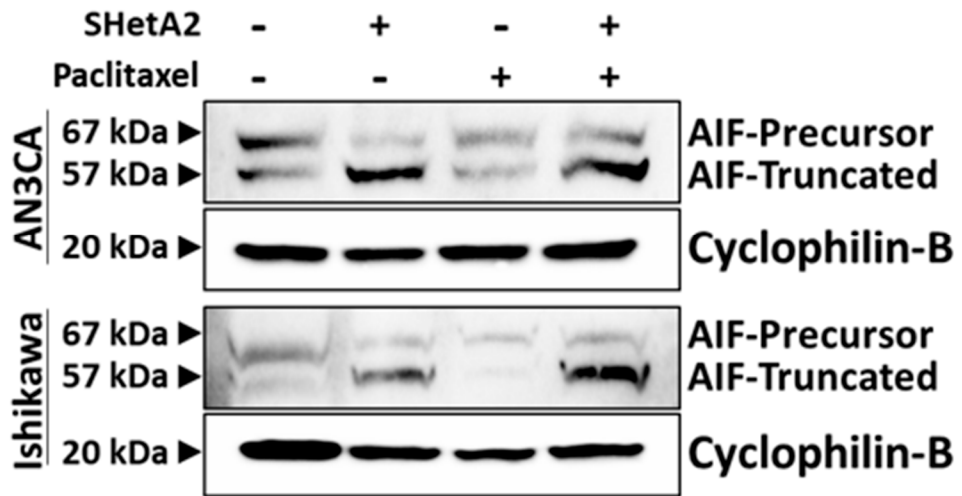

AN3CA

Loading Control

Ishikawa

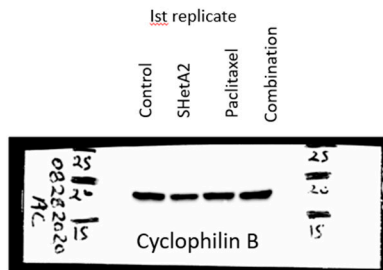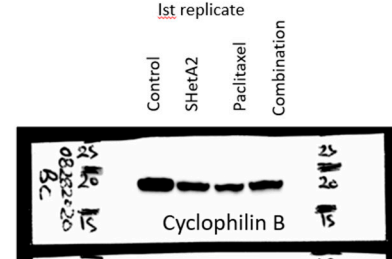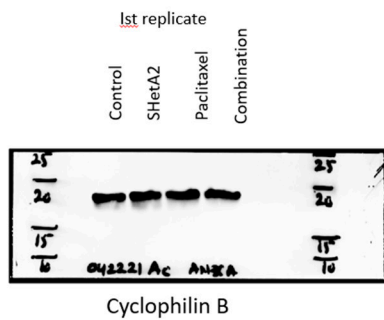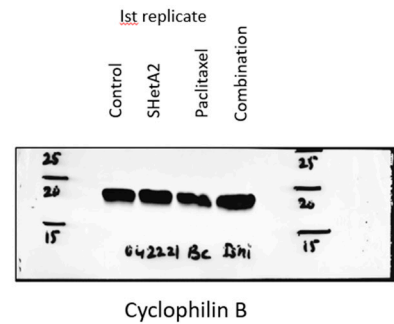

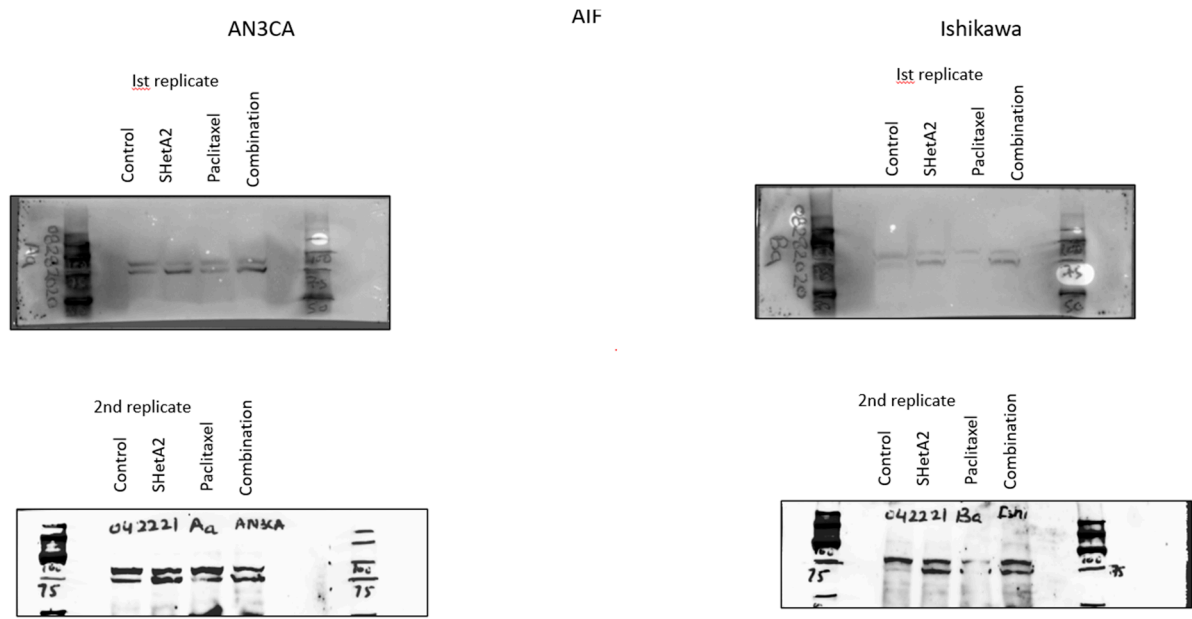

**Figure S2.** Full images of all Western blots of conducted in this study.
