# Supplementary material for: Utility and Mechanism of SHetA2 and Paclitaxel for Treatment of Endometrial Cancer
Source: Cancers (Basel). 2021 May 12;13(10):2322. doi: 10.3390/cancers13102322 (PMC8150795; doi:10.3390/cancers13102322)
Supplement: Supplementary file 1 [file cancers-13-02322-s001.zip › Supplemental Table 1.xlsx]

## Sheet: Sheet0
Table S1. Proteins altered by SHetA2 with <5% FDR in Ishikawa endometrial cancer cells
Symbol	Description	Location	Type(s)	Pathway	Peptide Count	Unique Peptides	Control A	Control B	Control C	SHetA2 A	SHetA2 B	SHetA2 C	Expr Fold Change	Mean of Control	Mean of SHetA2	Difference	SE of difference	t Ratio	df	p Value	q Value
ACTB	Actin, cytoplasmic 1 OS = Homo sapiens GN = ACTB PE = 1 SV = 1	Cytoplasm	other	EIF2 Signaling	79	14	297391	393269	240736	325325	432716	342648	1.182	310465	366896	-56431	3069	18.38	8632	<0.000001	<0.000001
EIF3M	Eukaryotic translation initiation factor 3 subunit M OS = Homo sapiens GN = EIF3M PE = 1 SV = 1	Cytoplasm	other	EIF2 Signaling	11	4	16385.2	15977.8	27671.9	33954.9	33852.3	32980	1.679	20012	33596	-13584	3069	4.426	8632	1e-05	0.00077
RPL14	60S ribosomal protein L14 OS = Homo sapiens GN = RPL14 PE = 1 SV = 4	Cytoplasm	other	EIF2 Signaling	11	6	47755.2	46795.1	44285.5	34502.4	34687.9	34675.2	-1.337	46279	34622	11657	3069	3.798	8632	0.000147	0.00905
RPL7A	60S ribosomal protein L7a OS = Homo sapiens GN = RPL7A PE = 1 SV = 2	Cytoplasm	other	EIF2 Signaling	26	17	46580.6	48335.4	41813.4	34757.5	34217.8	34440.4	-1.322	45576	34472	11105	3069	3.618	8632	0.000299	0.016551
EIF4A1	Eukaryotic initiation factor 4A-I OS = Homo sapiens GN = EIF4A1 PE = 1 SV = 1	Cytoplasm	translation regulator	EIF2 Signaling	48	16	106517	87982	95576.7	92253.6	73125.6	80018.7	-1.182	96692	81799	14893	3069	4.852	8632	1e-06	0.000125
RPSA	40S ribosomal protein SA OS = Homo sapiens GN = RPSA PE = 1 SV = 4	Cytoplasm	translation regulator	EIF2 Signaling	19	14	69457.1	64625.5	62132.1	58482.2	55642.4	51138.6	-1.187	65405	55088	10317	3069	3.361	8632	0.000779	0.036732
RPS3A	40S ribosomal protein S3a OS = Homo sapiens GN = RPS3A PE = 1 SV = 2	Nucleus	other	EIF2 Signaling	43	25	59736	57970.2	48061.5	43329	44019.2	43007.1	-1.272	55256	43452	11804	3069	3.846	8632	0.000121	0.007664
HSPA5	78 kDa glucose-regulated protein OS = Homo sapiens GN = HSPA5 PE = 1 SV = 2	Cytoplasm	enzyme	EIF2 Signaling, ER Stress & UPR	53	33	56199.4	57217	47684	74110.5	77369.4	75205.7	1.407	53700	75562	-21862	3069	7.122	8632	<0.000001	<0.000001
HSP90B1	Endoplasmin OS = Homo sapiens GN = HSP90B1 PE = 1 SV = 1	Cytoplasm	other	ER Stress & UPR	94	42	107475	106998	87012.3	89578.1	89518.4	83784.1	-1.147	100495	87627	12868	3069	4.192	8632	2.8e-05	0.002059
CALR	Calreticulin OS = Homo sapiens GN = CALR PE = 1 SV = 1	Cytoplasm	transcription regulator	ER Stress & UPR	20	14	54237	58100.6	53531	61521.4	73702.8	64948.1	1.207	55290	66724	-11435	3069	3.725	8632	0.000196	0.011446
HSPA8	Heat shock cognate 71 kDa protein OS = Homo sapiens GN = HSPA8 PE = 1 SV = 1	Cytoplasm	enzyme	UPR	71	30	169585	182388	137655	154417	158430	146138	-1.067	163210	152995	10215	3069	3.328	8632	0.000879	0.040563
P4HB	Protein disulfide-isomerase OS = Homo sapiens GN = P4HB PE = 1 SV = 3	Cytoplasm	enzyme	UPR	52	27	83856.8	99392.2	83478.5	96095.7	107488	106025	1.161	88909	103203	-14294	3069	4.657	8632	3e-06	0.000278
TPI1	Triosephosphate isomerase OS = Homo sapiens GN = TPI1 PE = 1 SV = 3	Cytoplasm	enzyme	Glycolysis	42	27	111909	125381	107666	128895	150062	131007	1.188	114985	136655	-21669	3069	7.06	8632	<0.000001	<0.000001
GAPDH	Glyceraldehyde-3-phosphate dehydrogenase OS = Homo sapiens GN = GAPDH PE = 1 SV = 3	Cytoplasm	enzyme	Glycolysis & Gluconeogenesis	43	26	218682	203792	153833	184171	193326	159792	-1.073	192102	179096	13006	3069	4.237	8632	2.3e-05	0.001747
PGK1	Phosphoglycerate kinase 1 OS = Homo sapiens GN = PGK1 PE = 1 SV = 3	Cytoplasm	kinase	Glycolysis & Gluconeogenesis	49	31	95175.5	95154.3	84355.2	104561	107211	100913	1.138	91562	104228	-12667	3069	4.127	8632	3.7e-05	0.002594
ALDOA	Fructose-bisphosphate aldolase A OS = Homo sapiens GN = ALDOA PE = 1 SV = 2	Cytoplasm	enzyme	Glycolysis, Gluconeogenesis	34	18	79636	74188.9	66907.4	66535.9	60715.9	60756.1	-1.174	73577	62669	10908	3069	3.554	8632	0.000382	0.020137
YWHAZ	14-3-3 protein zeta/delta OS = Homo sapiens GN = YWHAZ PE = 1 SV = 1	Cytoplasm	enzyme		32	13	105524	109858	101318	118489	125591	116946	1.14	105567	120342	-14775	3069	4.814	8632	2e-06	0.000145
DNM1L	Dynamin-1-like protein OS = Homo sapiens GN = DNM1L PE = 1 SV = 2	Cytoplasm	enzyme		45	28	60181.5	48177	43973.9	73825.1	63019.3	66523.6	1.335	50777	67789	-17012	3069	5.542	8632	<0.000001	4e-06
GLRX3	Glutaredoxin-3 OS = Homo sapiens GN = GLRX3 PE = 1 SV = 2	Cytoplasm	enzyme		12	6	157109	126550	126268	120331	123885	103793	-1.178	136642	116003	20639	3069	6.724	8632	<0.000001	<0.000001
IMPDH1	Inosine-5'-monophosphate dehydrogenase 1 OS = Homo sapiens GN = IMPDH1 PE = 1 SV = 2	Cytoplasm	enzyme		2	1	14102.9	37874.8	10573.1	19556	39366.1	34830	1.499	20850	31251	-10400	3069	3.388	8632	0.000706	0.034012
NDUFS4	NADH dehydrogenase [ubiquinone] iron-sulfur protein 4, mitochondrial OS = Homo sapiens GN = NDUFS4 PE = 1 SV = 1	Cytoplasm	enzyme		1	1	55768.9	51544.9	61431.7	109486	90836.1	93052.1	1.739	56249	97791	-41543	3069	13.53	8632	<0.000001	<0.000001
PLOD1	Procollagen-lysine,2-oxoglutarate 5-dioxygenase 1 OS = Homo sapiens GN = PLOD1 PE = 1 SV = 2	Cytoplasm	enzyme		19	9	54459	70241.1	61388.8	67159.9	88140.9	77947.2	1.253	62030	77749	-15720	3069	5.121	8632	<0.000001	3.3e-05
PPIA	Peptidyl-prolyl cis-trans isomerase A OS = Homo sapiens GN = PPIA PE = 1 SV = 2	Cytoplasm	enzyme		42	29	74896.2	102980	76996.8	107083	119698	106167	1.306	84957	110983	-26025	3069	8.479	8632	<0.000001	<0.000001
CCT8	T-complex protein 1 subunit theta OS = Homo sapiens GN = CCT8 PE = 1 SV = 4	Cytoplasm	enzyme		43	27	193993	132714	110152	95332.5	89825.6	75191.4	-1.678	145620	86783	58836	3069	19.17	8632	<0.000001	<0.000001
UBA1	Ubiquitin-like modifier-activating enzyme 1 OS = Homo sapiens GN = UBA1 PE = 1 SV = 3	Cytoplasm	enzyme		43	27	89870	98708.9	100596	132081	128801	129425	1.35	96392	130103	-33711	3069	10.98	8632	<0.000001	<0.000001
CKB	Creatine kinase B-type OS = Homo sapiens GN = CKB PE = 1 SV = 1	Cytoplasm	kinase		18	10	57467.7	49062.7	45946.1	42679.7	41431.3	36129.4	-1.268	50826	40080	10745	3069	3.501	8632	0.000466	0.023477
YWHAB	14-3-3 protein beta/alpha OS = Homo sapiens GN = YWHAB PE = 1 SV = 3	Cytoplasm	other		30	9	51780.5	59661.3	81139.7	75965.3	76650.9	87605.4	1.247	64194	80074	-15880	3069	5.174	8632	<0.000001	2.6e-05
YWHAE	14-3-3 protein epsilon OS = Homo sapiens GN = YWHAE PE = 1 SV = 1	Cytoplasm	other		41	18	46579.8	55082.4	45567.4	54114.2	70187.3	60807.3	1.257	49077	61703	-12626	3069	4.114	8632	3.9e-05	0.002639
KRT36	Keratin, type I cuticular Ha6 OS = Homo sapiens GN = KRT36 PE = 2 SV = 1	Cytoplasm	other		6	1	57554.2	40637	45207.9	67129.7	52087.7	58718.6	1.241	47800	59312	-11512	3069	3.751	8632	0.000178	0.010631
TRIP11	Thyroid receptor-interacting protein 11 OS = Homo sapiens GN = TRIP11 PE = 1 SV = 3	Cytoplasm	transcription regulator		8	5	67810.5	54166.4	43640.7	42916.7	48494.1	40245.2	-1.258	55206	43885	11321	3069	3.688	8632	0.000227	0.012911
IL7	Interleukin-7 OS = Homo sapiens GN = IL7 PE = 1 SV = 1	Extracellular Space	cytokine		3	3	23739.5	33380.5	28826.1	32755.8	44904.7	41180.2	1.383	28649	39614	-10965	3069	3.572	8632	0.000356	0.019228
C12orf60	Uncharacterized protein C12orf60 OS = Homo sapiens GN = C12orf60 PE = 2 SV = 2	Extracellular Space	other		2	1	257548	208596	154749	124817	120424	97295.2	-1.813	206964	114178	92786	3069	30.23	8632	<0.000001	<0.000001
ALB	Serum albumin OS = Homo sapiens GN = ALB PE = 1 SV = 2	Extracellular Space	transporter		39	25	198219	155286	153425	138049	116928	100279	-1.427	168977	118419	50558	3069	16.47	8632	<0.000001	<0.000001
CCDC88B	Coiled-coil domain-containing protein 88B OS = Homo sapiens GN = CCDC88B PE = 1 SV = 1	Nucleus	enzyme		7	3	30770.1	26557.7	36926.1	58665.4	46904.1	49436.8	1.645	31418	51669	-20251	3069	6.598	8632	<0.000001	<0.000001
SSB	Lupus La protein OS = Homo sapiens GN = SSB PE = 1 SV = 2	Nucleus	enzyme		41	15	96487.9	65299.6	75564.4	58695.5	46111.4	45942.3	-1.574	79117	50250	28868	3069	9.405	8632	<0.000001	<0.000001
RECQL	ATP-dependent DNA helicase Q1 OS = Homo sapiens GN = RECQL PE = 1 SV = 3	Nucleus	enzyme		14	8	14940.7	7938.2	16642.8	26849.8	24052.4	24375.4	1.905	13174	25093	-11919	3069	3.883	8632	0.000104	0.006773
NCAPD2	Condensin complex subunit 1 OS = Homo sapiens GN = NCAPD2 PE = 1 SV = 3	Nucleus	other		8	6	358157	396340	416530	751627	455265	614614	1.555	390342	607169	-216826	3069	70.64	8632	<0.000001	<0.000001
H4C1	Histone H4 OS = Homo sapiens GN = HIST1H4A PE = 1 SV = 2	Nucleus	other		13	11	49474.6	48052.7	51832.3	82795.9	81582.3	70852.5	1.575	49787	78410	-28624	3069	9.325	8632	<0.000001	<0.000001
MIS18BP1	Mis18-binding protein 1 OS = Homo sapiens GN = MIS18BP1 PE = 1 SV = 1	Nucleus	other		3	2	62923.3	44273.2	50059.9	41893.9	33407.9	32735.7	-1.456	52419	36013	16406	3069	5.345	8632	<0.000001	1.1e-05
NCBP1	Nuclear cap-binding protein subunit 1 OS = Homo sapiens GN = NCBP1 PE = 1 SV = 1	Nucleus	other		10	4	6690.31	27384.7	10445.3	2219.86	2573.13	8514.1	-3.345	14840	4436	10404	3069	3.39	8632	0.000703	0.034012
CDY1 (includes others)	Testis-specific chromodomain protein Y 2 OS = Homo sapiens GN = CDY2A PE = 1 SV = 1	Nucleus	transcription regulator		5	3	48628.4	38890.2	56932.4	76310.5	48486.3	57635.7	1.263	48150	60811	-12661	3069	4.125	8632	3.7e-05	0.002594
NPM1	Nucleophosmin OS = Homo sapiens GN = NPM1 PE = 1 SV = 2	Nucleus	transcription regulator		21	13	32902	43030.9	35076	47434.4	62666.3	48552.4	1.429	37003	52884	-15881	3069	5.174	8632	<0.000001	2.6e-05
CSE1L	Exportin-2 OS = Homo sapiens GN = CSE1L PE = 1 SV = 3	Nucleus	transporter		50	35	35367.9	32081.8	34350.7	48399.8	50135.9	45979.1	1.42	33933	48172	-14238	3069	4.639	8632	4e-06	0.000292
ANXA1	Annexin A1 OS = Homo sapiens GN = ANXA1 PE = 1 SV = 2	Plasma Membrane	enzyme		46	33	24363.2	27965.9	23965.7	37577	43732.7	38432.5	1.569	25432	39914	-14482	3069	4.718	8632	2e-06	0.000222
GP5	Platelet glycoprotein V OS = Homo sapiens GN = GP5 PE = 1 SV = 1	Plasma Membrane	other		1	1	70250.4	63963.2	64403.4	60633.4	51498.7	54116.1	-1.195	66206	55416	10790	3069	3.515	8632	0.000442	0.022758
TES	Testin OS = Homo sapiens GN = TES PE = 1 SV = 1	Plasma Membrane	other		12	3	32242.2	22553.7	28578.5	17541.7	11086.6	11363.7	-2.085	27791	13331	14461	3069	4.711	8632	3e-06	0.000222
ANXA5	Uncharacterized protein C12orf60 OS = Homo sapiens GN = C12orf60 PE = 2 SV = 2	Plasma Membrane	transporter		2	1	257548	208596	154749	124817	120424	97295.2	1.475	44802	66073	-21270	3069	6.93	8632	<0.000001	<0.000001
TM9SF2	Transmembrane 9 superfamily member 2 OS = Homo sapiens GN = TM9SF2 PE = 1 SV = 1	Plasma Membrane	transporter		9	5	61508.1	50779.1	61104.4	106417	75516	87955.8	1.557	57797	89963	-32166	3069	10.48	8632	<0.000001	<0.000001
