# Supplementary material for: Utility and Mechanism of SHetA2 and Paclitaxel for Treatment of Endometrial Cancer
Source: Cancers (Basel). 2021 May 12;13(10):2322. doi: 10.3390/cancers13102322 (PMC8150795; doi:10.3390/cancers13102322)
Supplement: Supplementary file 1 [file cancers-13-02322-s001.zip › Supplemental Table 2.xlsx]

## Sheet: Sheet0
Table S2. Pathways altered by SHetA2 in Ishikawa endometrial cancer cells. © 2000-2021 QIAGEN. All rights reserved.
ID	Molecules in Network	Score	Focus Molecules	Top Diseases and Functions
1	14-3-3 (β,ε,ζ),14-3-3-Cdc25,14-3-3-Cdkn1b,26s Proteasome,40S Ribosome-eIF3-mRNA-eIF4A-eIF4B-eIF4E-eIF4G,48s,ANXA1,ANXA5,ATPase,CALR,CCDC88B,EIF3M,EIF4A1,Eif4g,ERK1/2,GAPDH,HSP,Hsp70,HSPA5,HSPA8,MHC Class I (complex),NCBP1,NPM1,Pdi,PLOD1,PP2A,PPIA,RECQL,RNA polymerase II,Rnr,RPS3A,RPSA,UBA1,Ubiquitin,YWHAZ	43	18	[Cancer, Gastrointestinal Disease, Hepatic System Disease]
2	14-3-3,14-3-3-Bad,14-3-3-FOXO3,ACTB,Actin,ALDOA,Calmodulin,CCT8,CD3,CG,Ck2,CKB,Cofilin,DNM1L,F Actin,GLRX3,Histone h3,Hsp90,Insulin,Jnk,NCAPD2,NDUFS4,NFkB (complex),P4HB,PI3K p85,Pkc(s),RAS,Rb,SSB,TES,TPI1,TRIP11,YAP/TAZ-14-3-3,YWHAB,YWHAE	34	15	[Cellular Movement, Hematological Disease, Immunological Disease]
3	BIRC3,BMP4,C12orf60,CDY1 (includes others),CFAP300,CUL3,CUL4A,CXXC5,FN3KRP,H4C1,HMGN4,IMPDH1,Interferon alpha,KIF14,KLHL9,KRT36,MIS18BP1,NOL7,NPM3,PHF2,PRDM2,PRR12,RPL14,RPL35,RPL35A,RPL36A,RPL37,RPL7A,RPL7L1,RRP9,SLBP,SLFN5,THOC3,TM9SF2,UTP20	18	9	[Protein Synthesis, RNA Damage and Repair, RNA Post-Transcriptional Modification]
4	Akt,ALB,Ap1,BCR (complex),collagen type i (family),Collagen(s),CSE1L,cytokine,EGLN,ERK,Fibrinogen,GP5,Growth hormone,Gsk3,HDL,Hif1,Histone h4,HSP90B1,IgG,IL12 (complex),IL7,Immunoglobulin,Integrin,LDL,Lh,MAP2K1/2,Mapk,Nfat (family),P38 MAPK,PGK1,PI3K (complex),PLC gamma,TCR,Tgf beta,Vegf	11	6	[Cancer, Gastrointestinal Disease, Hepatic System Disease]
